# Supplementary material
Source: publisher figshare collection journal article supplement (https://rs.figshare.com/ndownloader/files/25508906)
Supplement: Supplementary file 1 [file 25508906]

function [f_nl,Mr,Rr,r,dr,g_exp,L_exp,f_coexp,g,G,b] = generate_ROM(NR,NS,N_ROM,G,b)
%{
Inputs
    NR      number of reduced modes
    NS      number of static modes
    N_ROM   order of nonlinearity

Optional inputs/outputs (1)
    G       coefficients of terms in g functions    n1 x NU
    b       coefficients of terms in Lagrangian     n2 x 1      with n2 > n1

Outpus
    ------------ used for generating ROM functions for COCO (2) ------------
    f_nl	"standard" nonlinear stiffness terms    NR x 1      fun of r
    Mr      "inertia" terms                         NR x NR     fun of r
    Rr      "gyroscopic" terms                      NR x 1      fun of r and dr
    r       vector of reduced positions             NR x 1
    dr      vector of reduced velocities            NR x 1

    ----------------------- used for fitting G and b -----------------------
    g_exp   exponents of terms in g functions       n1 x NR
    L_exp   exponents of terms in Lagrangian        n2 x 1
    f_coexp "scale factors" and exponents of NL     NR x 1 cell, each cell n2 x (NR+1)
            terms in ROM
    g       quasi-static coupling function          NU x 1      fun of r

(1) Input of G and b is optional, but must be numeric. If they are not
    input, then they will be output as symbolic arrays.

(2)	To be used as follows:
	ICE ROM         d2r + om*r + f_ROM = 0
    ICE-IC ROM      Mr*d2r + Rr + om*r + f_ROM = 0

Updated     2020-05-18
e.nicolaidou@bristol.ac.uk

%}

assert(nargin == 3 | nargin == 5);

%% Generate exponents of nonlinear terms
r = sym('r',[NR,1]);	% reduced positions
dr = sym('dr',[NR,1]);	% reduced velocities

p = 2:N_ROM+1;          % power
exp = cell(size(p));    % exponents of terms
for i = 1:length(p)
    exp{i} = EveryComb(NR,p(i));
end
L_exp = vertcat(exp{2:end});	% exponents of terms in Lagrangian (order 3 to N+1)
g_exp = vertcat(exp{1:end-1});	% exponents of terms in g functions (order 2 to N)

f_coexp = cell(NR,1);           % scale factors* and exponents of nonlinear stiffness terms in ROM
for i = 1:length(f_coexp)
    f_coexp{i} = [L_exp(:,i),L_exp];
    f_coexp{i}(:,i+1) = f_coexp{i}(:,i+1) - 1;
end

% *first column is the scale factor w.r.t. the Lagrangian coefficients,
% remaining columns are the exponents

%% Generate "standard" nonlinear stiffness terms
% coefficients of Lagrangian terms
if nargin == 3
    b = sym('b',[size(L_exp,1),1]);
else
    assert(all(size(b) == [size(L_exp,1),1]),'Input valid Lagrangian coefficients!');
end
f_nl = sym(zeros(NR,1));        % nonlinear stiffness terms in ROM
for i = 1:NR
    c = f_coexp{i}(:,1).*b;     % coefficients of stiffness terms (i.e. scale factor * coefficients of Lagrangian terms)
    f_terms = prod(r.'.^f_coexp{i}(:,2:end),2);
    f_nl(i) = sum(c.*f_terms);
end

%% Generate g and derivatives
% coefficients of quasi-static coupling functions
if nargin == 3
    G = sym('G',[size(g_exp,1),NS]);
else
    assert(all(size(G) == [size(g_exp,1),NS]),'Input valid quasi-static coupling coefficients!')
end
g_terms = prod(r.'.^g_exp,2);
g = sum(G.*g_terms).';      % g function: (N-R) x 1

J = sym(zeros(NS,NR));      % Jacobian of g funciton: (N-R) x R
H = sym(zeros(NS,NR,NR));	% Hessian of g function: (N-R) x R x R
for j = 1:NR
    J(:,j) = diff(g,r(j));
    for k = 1:NR
        H(:,j,k) = diff(diff(g,r(j)),r(k));
    end
end

%% Generate H*dr*dr function
Hdr = sym(zeros(NS,NR));
for k = 1:NR
    Hdr = Hdr + H(:,:,k)*dr(k);
end
Hdrdr = Hdr*dr;

%% Generate ICE-IC ROM functions
Mr = eye(NR) + J.'*J;
Rr = J.'*Hdrdr;
end
